# Supplementary material
Source: PubMed Central journal article supplement (PMC9203615)
Supplement: 13167_2022_279_MOESM1_ESM.pdf [file 13167_2022_279_MOESM1_ESM.pdf]

a

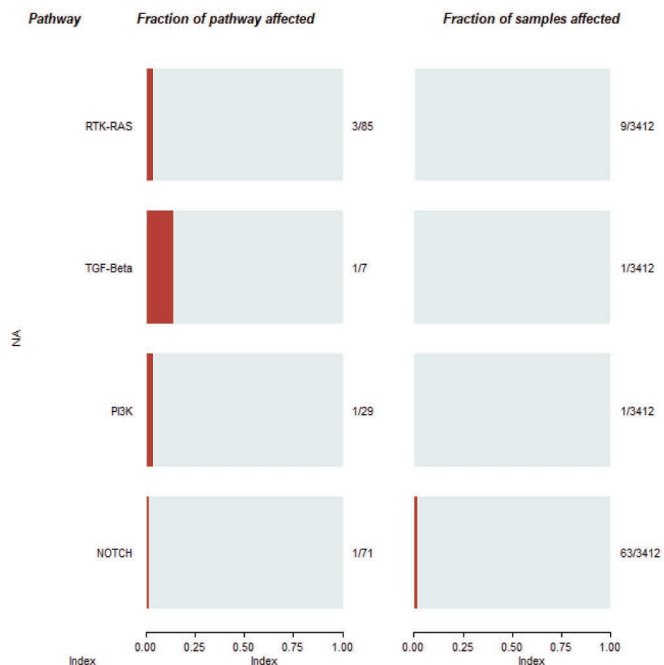

b

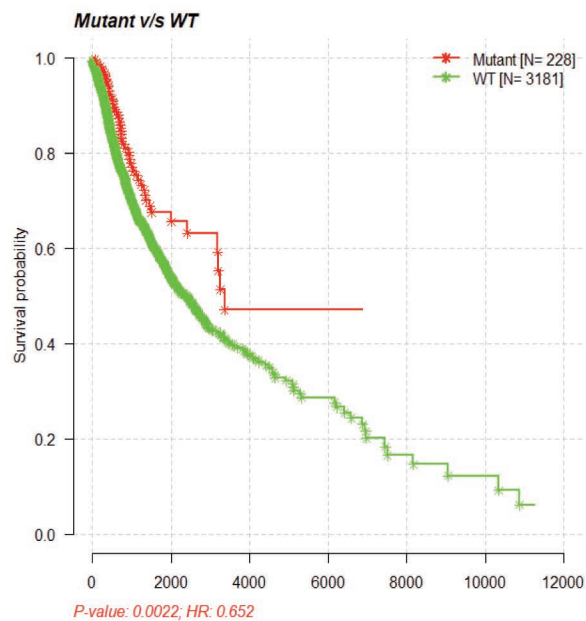

c

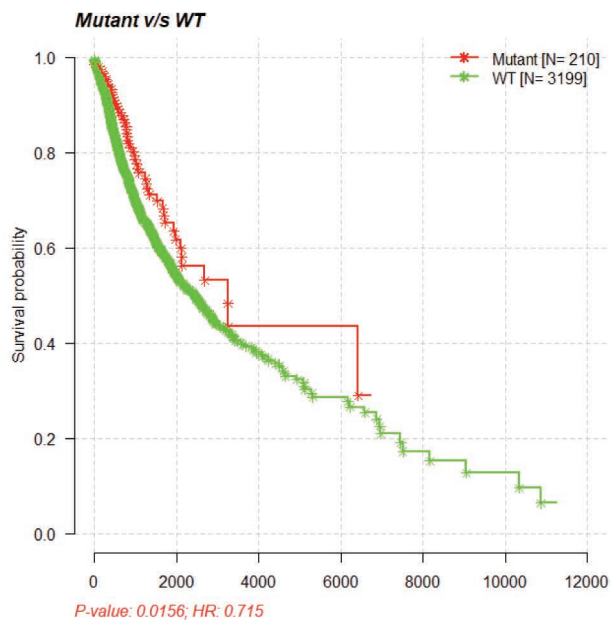

d

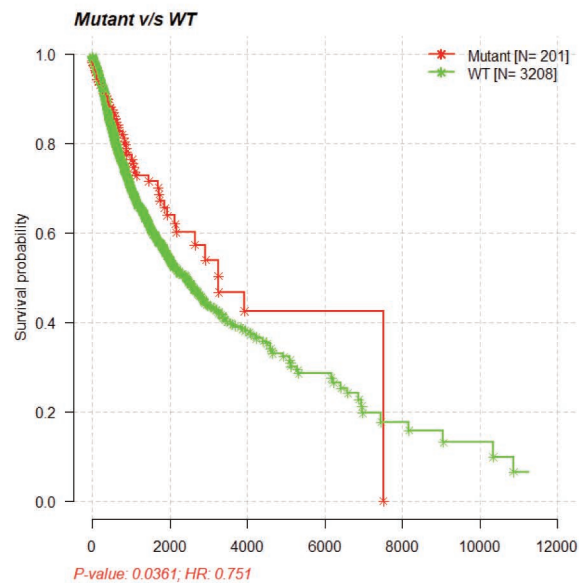

Supplementary Figure 1.a. Enrichment pathways of mutant SGs.

b. Survival analysis of THOC2 mutant group and wild-type group.

c. Survival analysis of PRPF8 mutant group and wild-type group.

d. Survival analysis of SF3B1 mutant group and wild-type group.
