# Supplementary material
Source: PubMed Central journal article supplement (PMC9203615)
Supplement: 13167_2022_279_MOESM4_ESM.pdf [file 13167_2022_279_MOESM4_ESM.pdf]

a

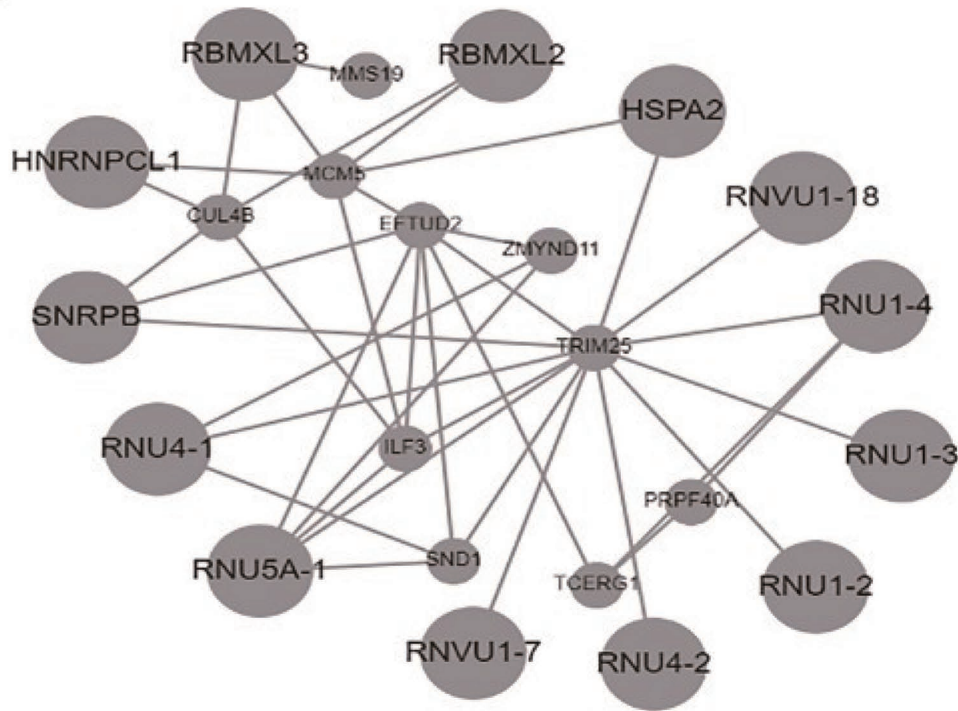

b

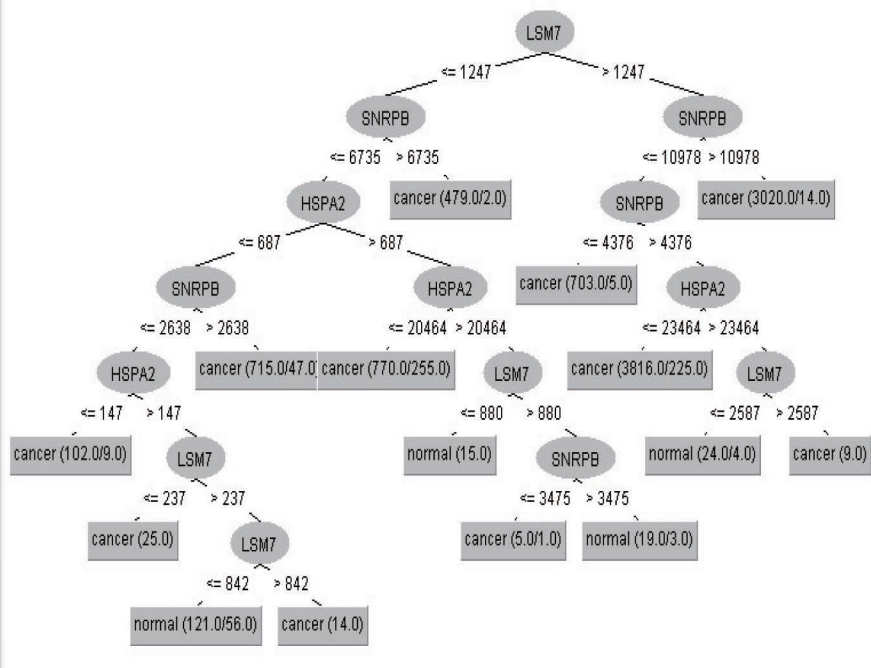

Supplementary Figure 4. a. Protein interactions of differential SGs.

b. J48 classification tree based on three characteristic SGs.
