# Supplementary material
Source: PubMed Central journal article supplement (PMC9203615)
Supplement: 13167_2022_279_MOESM5_ESM.pdf [file 13167_2022_279_MOESM5_ESM.pdf]

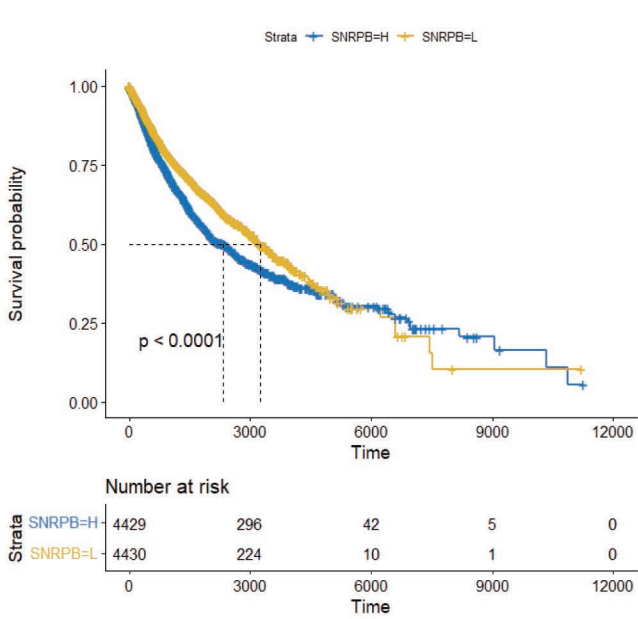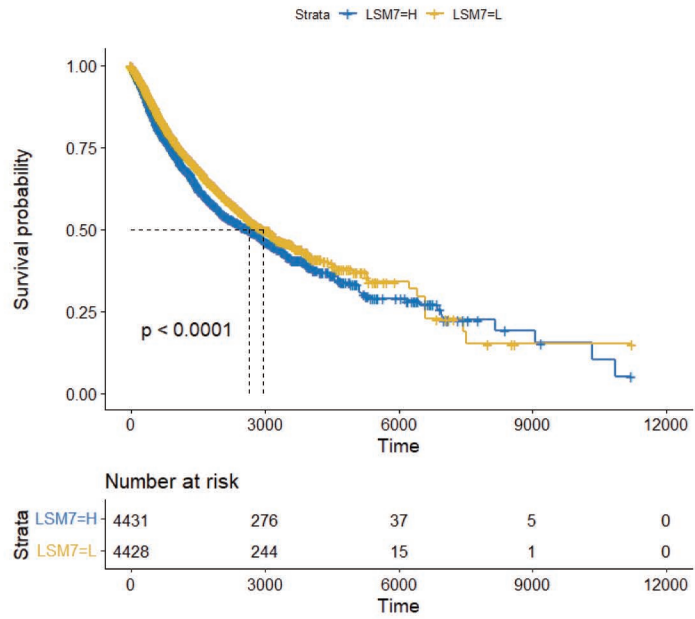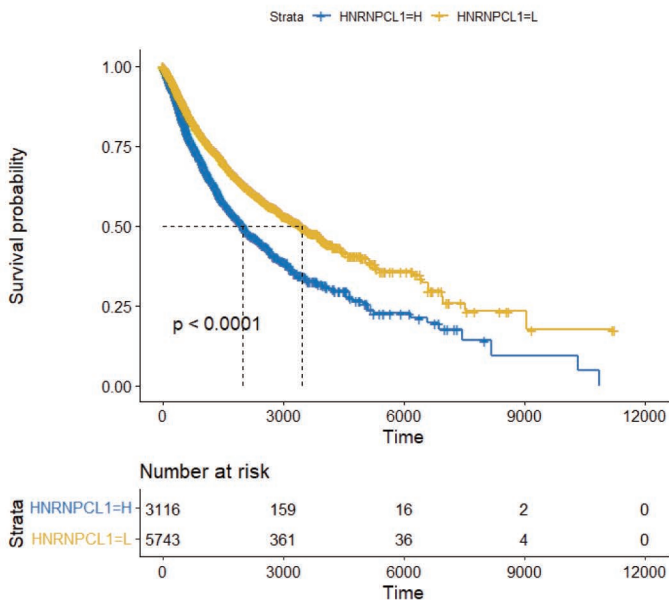

Supplementary Figure 5. Survival analysis of high expression group and low expression group of three differential SGs.
