# Supplementary material
Source: PubMed Central journal article supplement (PMC9203615)
Supplement: 13167_2022_279_MOESM6_ESM.pdf [file 13167_2022_279_MOESM6_ESM.pdf]

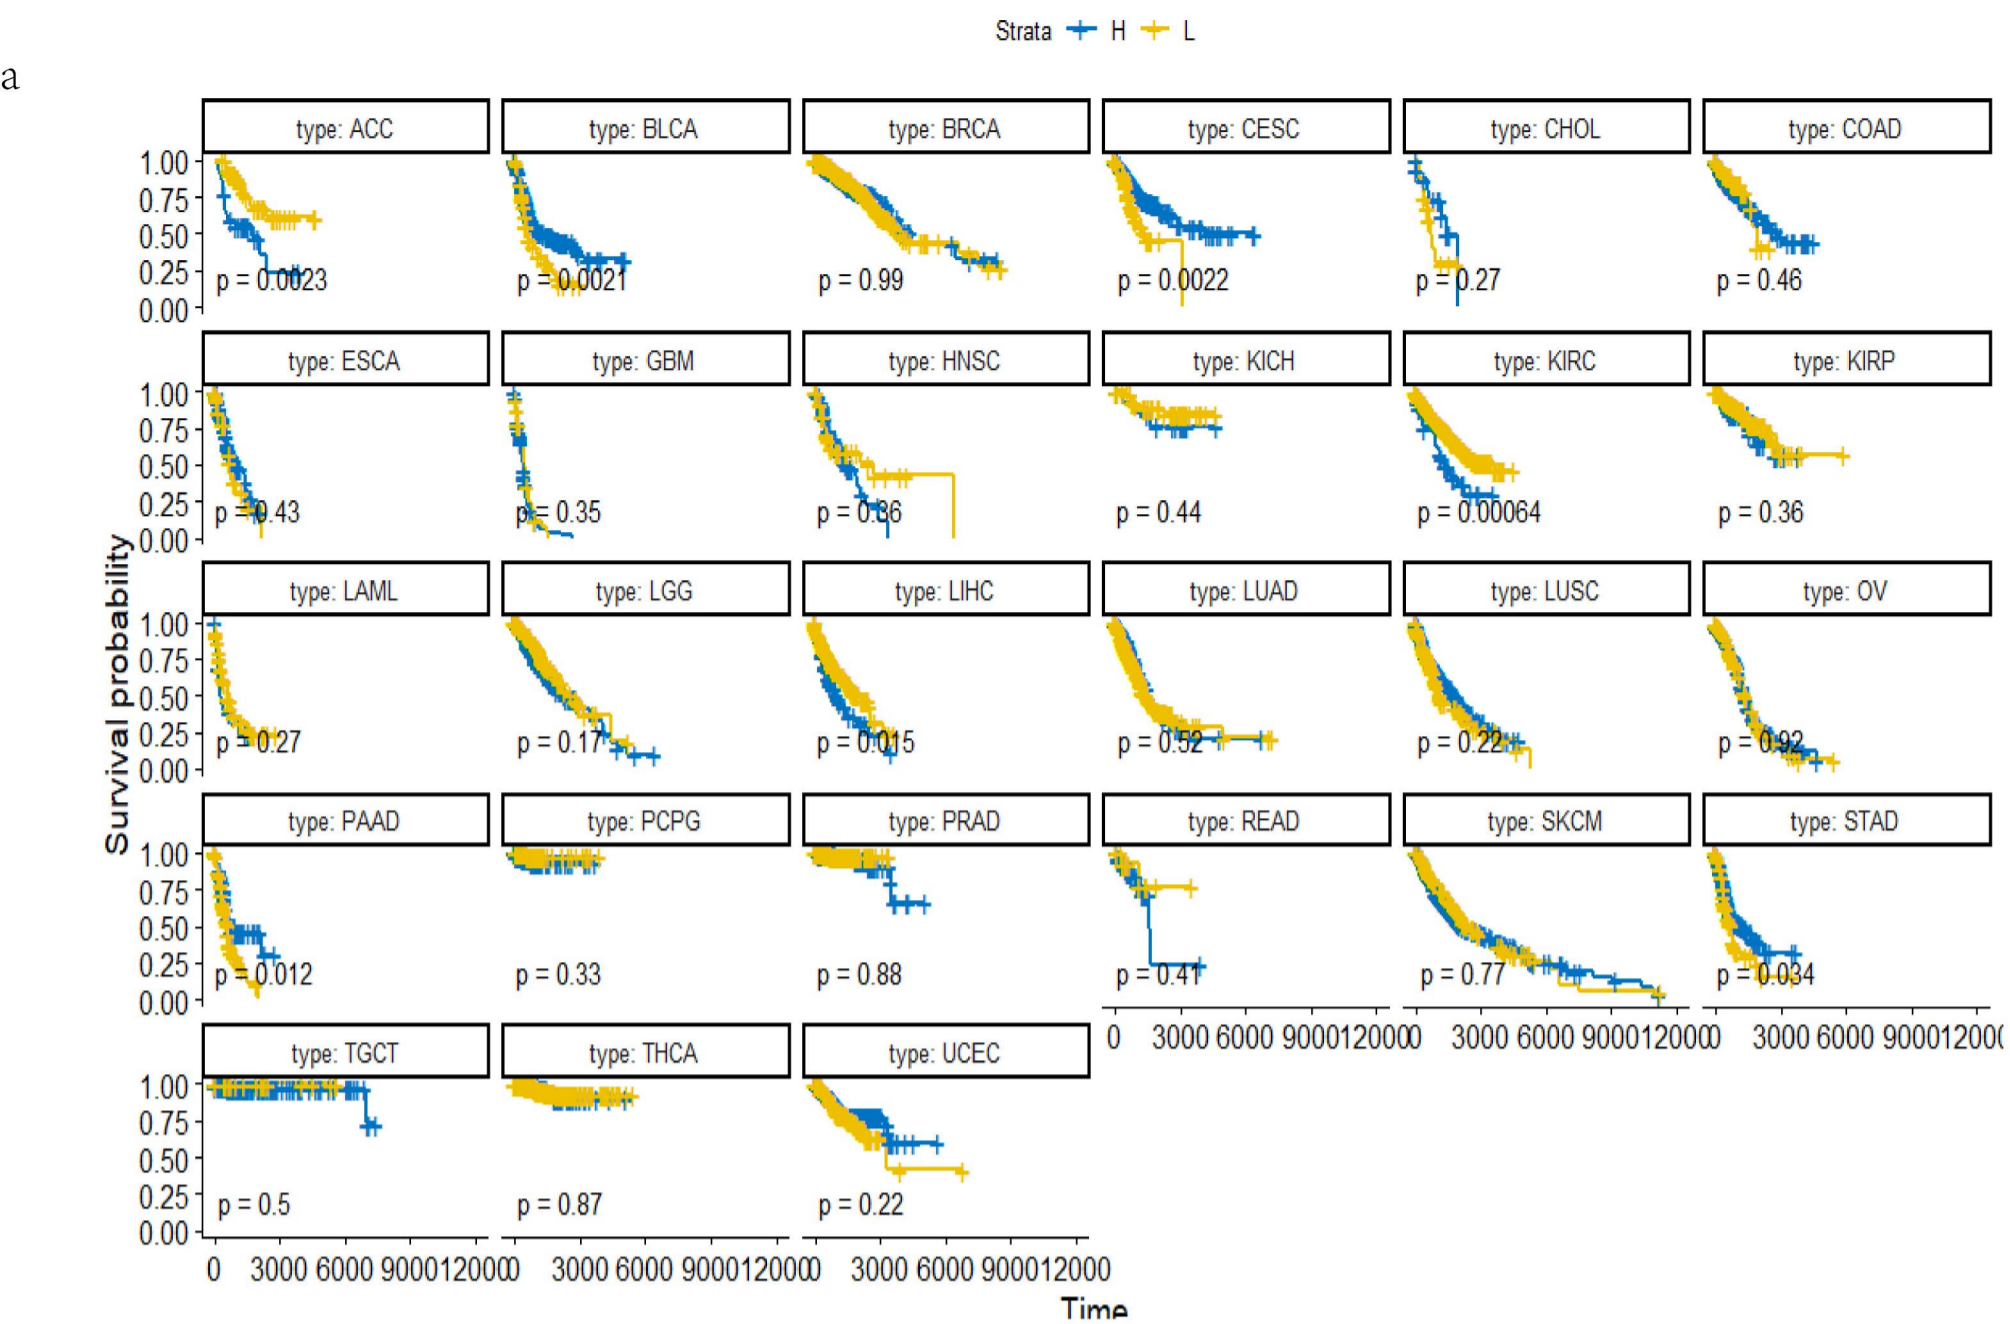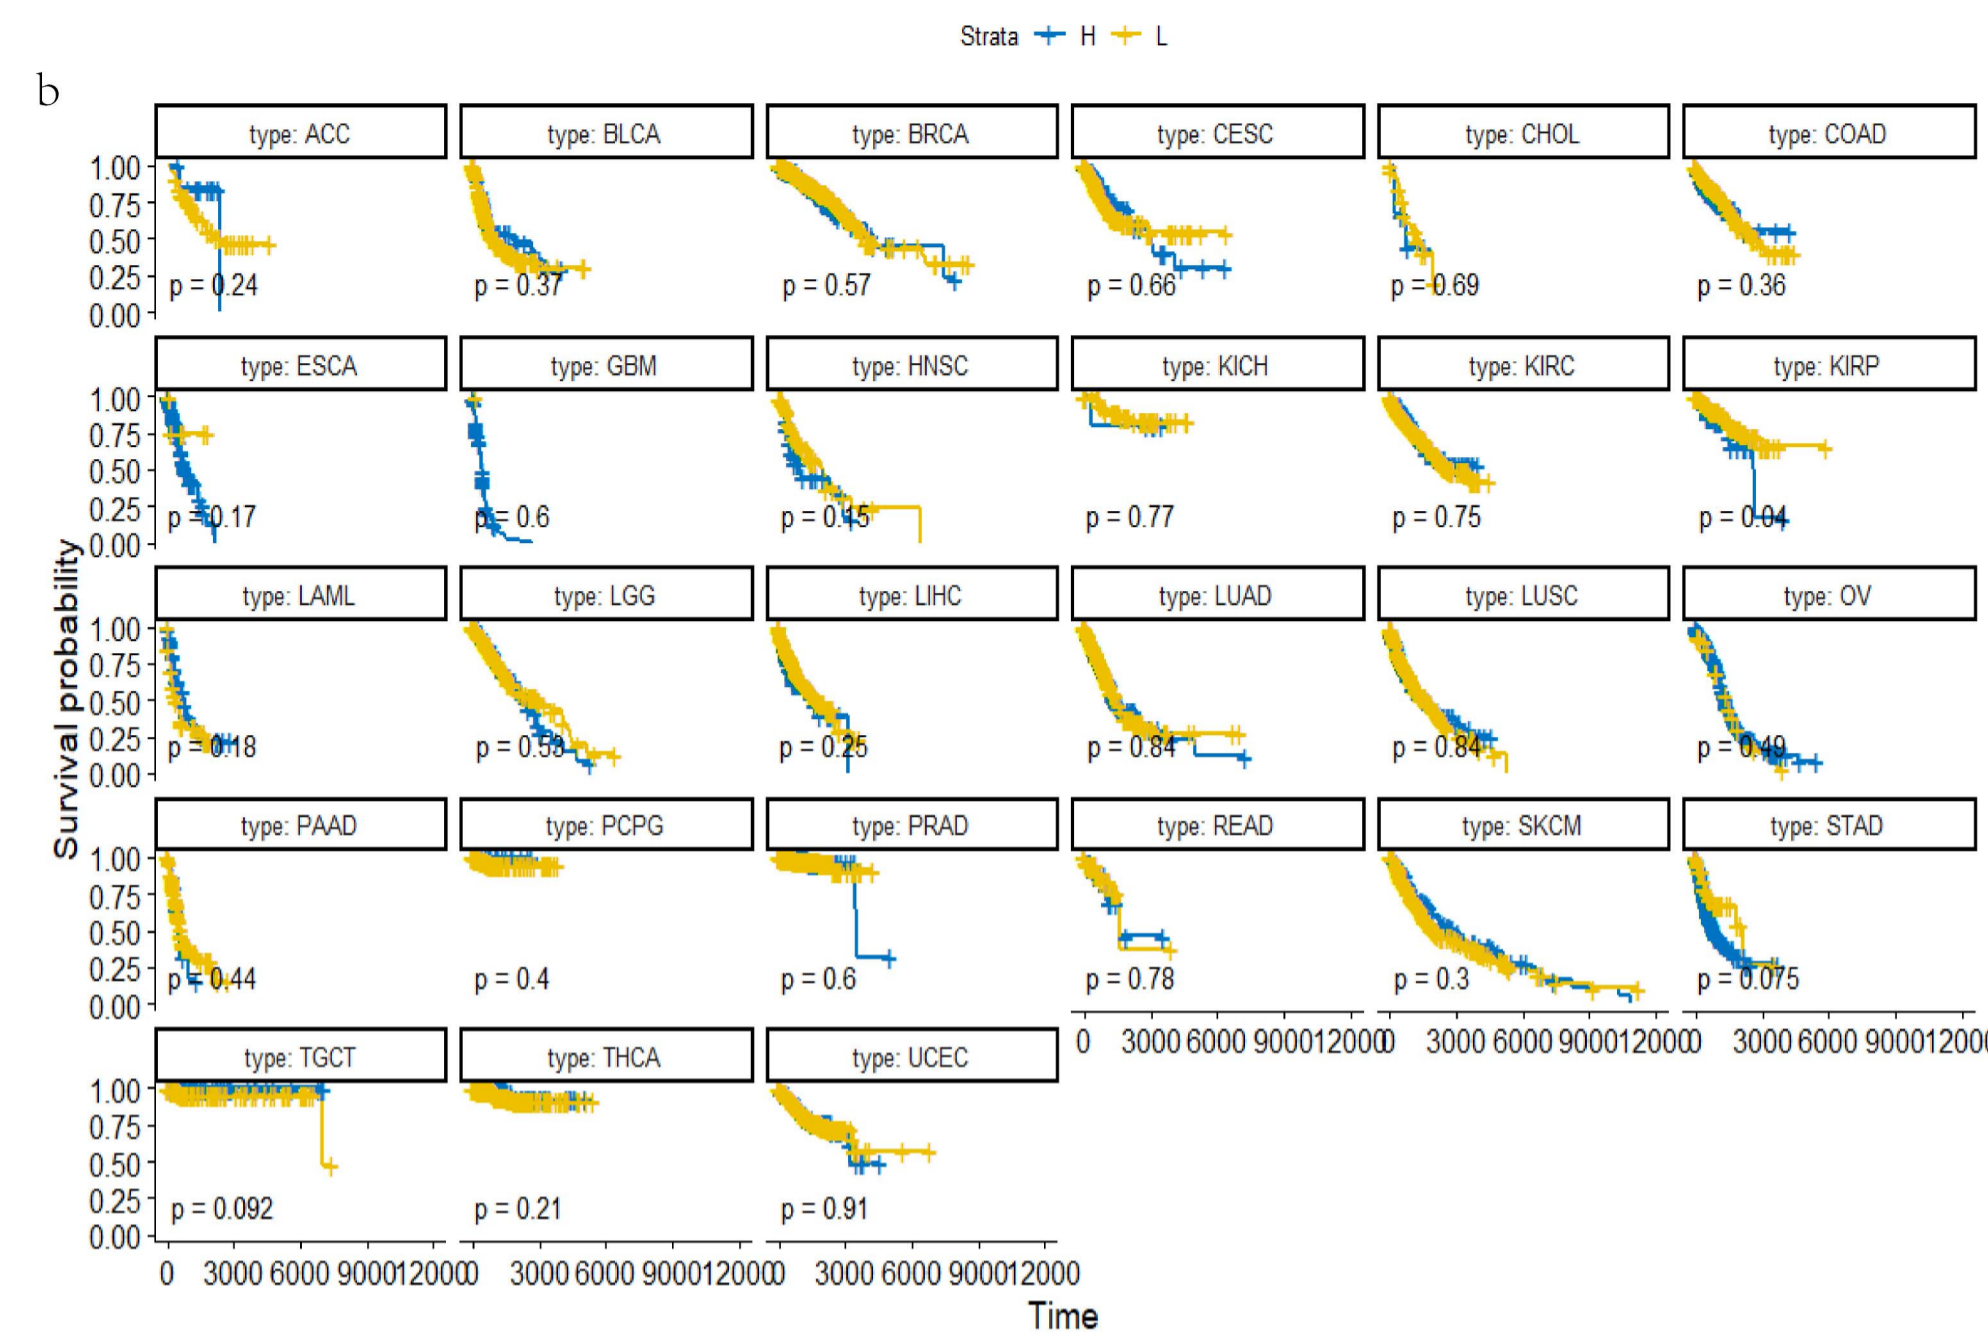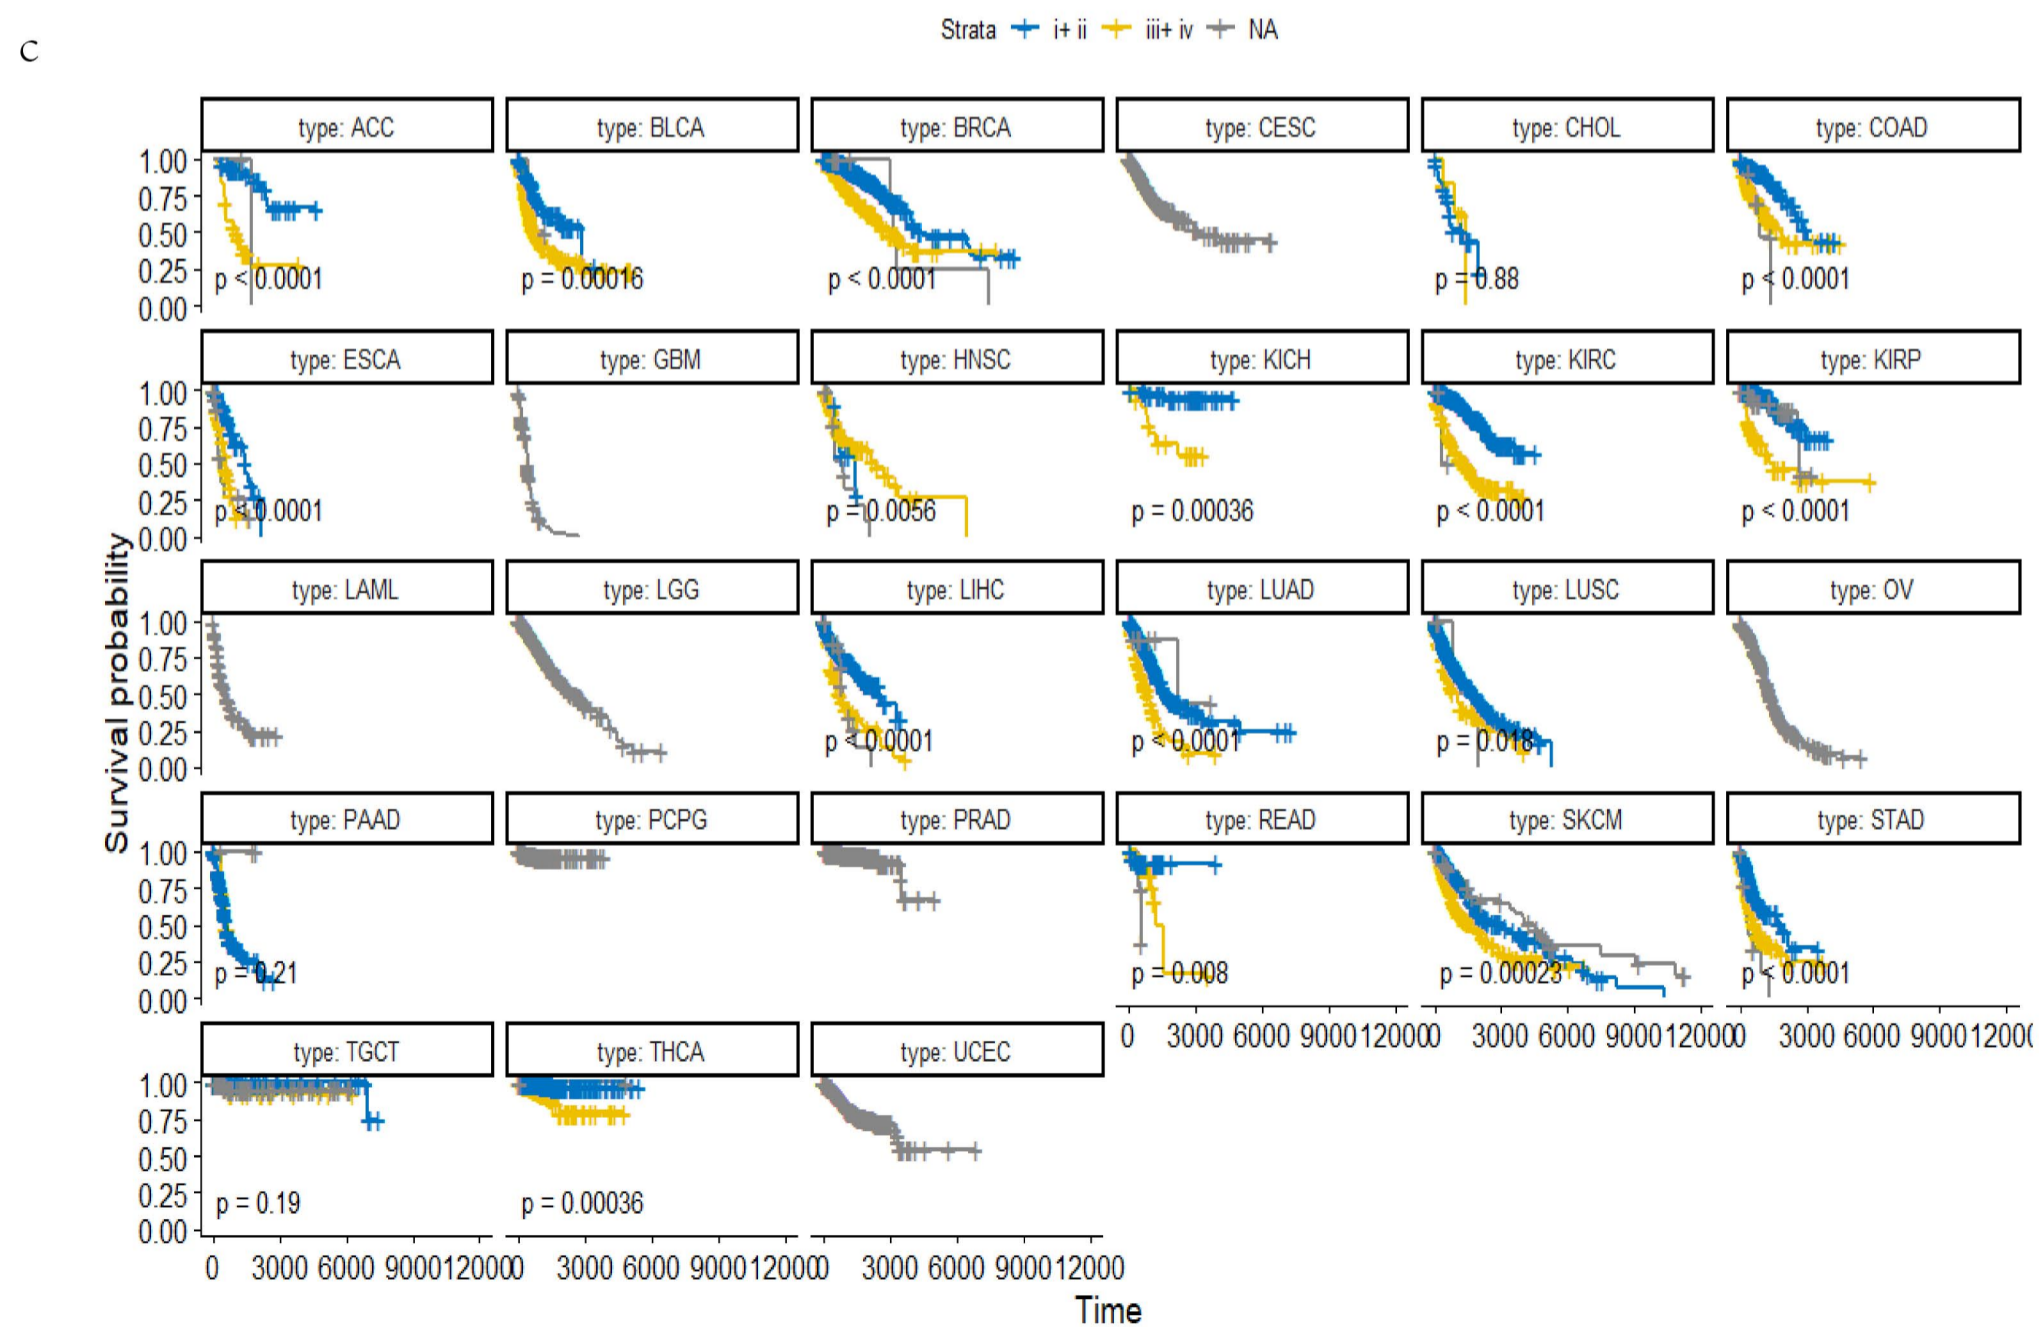

Supplementary Figure 6. a. Survival analysis of LSM7 in different types of tumors. b. Survival analysis of HNRNPCL1 in different types of tumors. c. Survival analysis of clinical stage in different types of tumors.
