# Supplementary material
Source: PubMed Central journal article supplement (PMC9203615)
Supplement: 13167_2022_279_MOESM7_ESM.pdf [file 13167_2022_279_MOESM7_ESM.pdf]

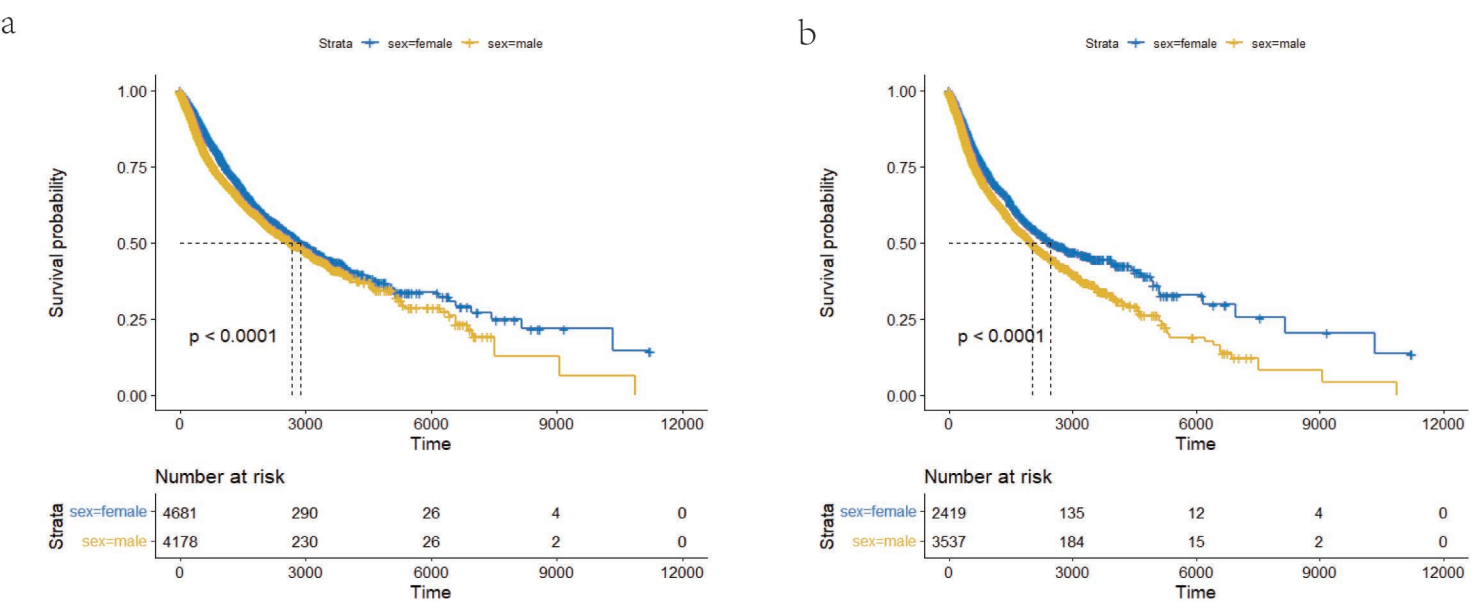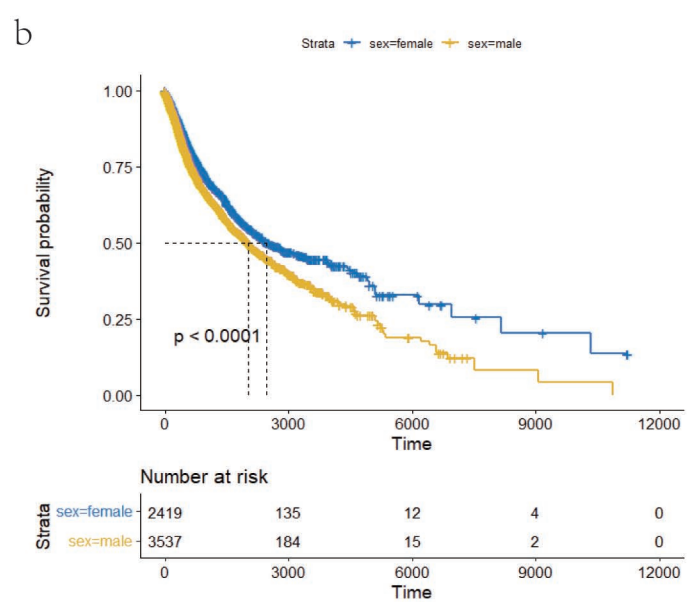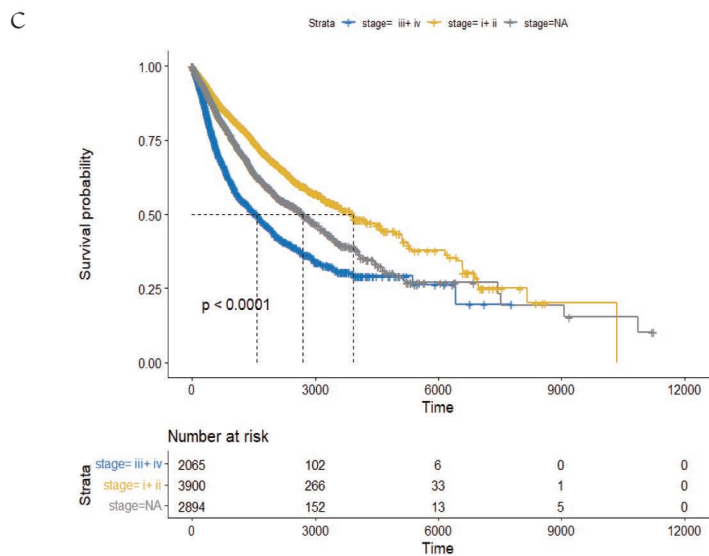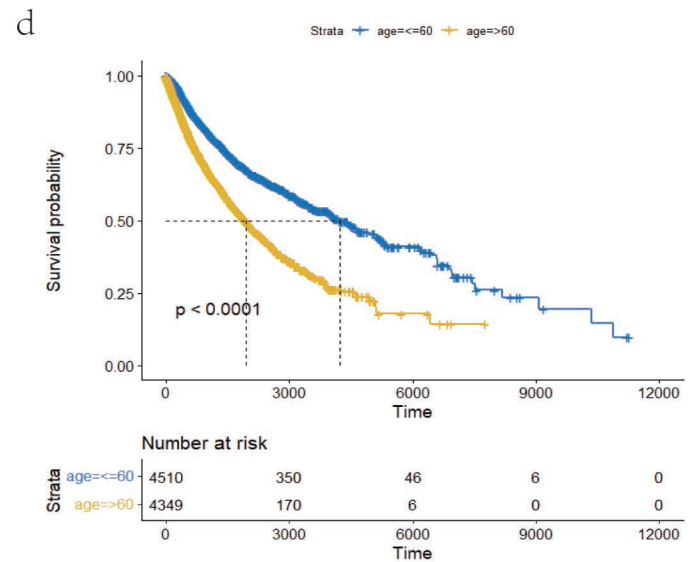

Supplementary Figure 7. a. Survival analysis of different sex in 27 kinds of tumors.

b. Survival analysis of patients with tumors of different genders, excluding sex-specific tumors.

c. Survival analysis of tumor patients with different clinical stages.

d. Survival analysis of cancer patients of different ages.
