# Supplementary material
Source: PubMed Central journal article supplement (PMC9203615)
Supplement: 13167_2022_279_MOESM9_ESM.pdf [file 13167_2022_279_MOESM9_ESM.pdf]

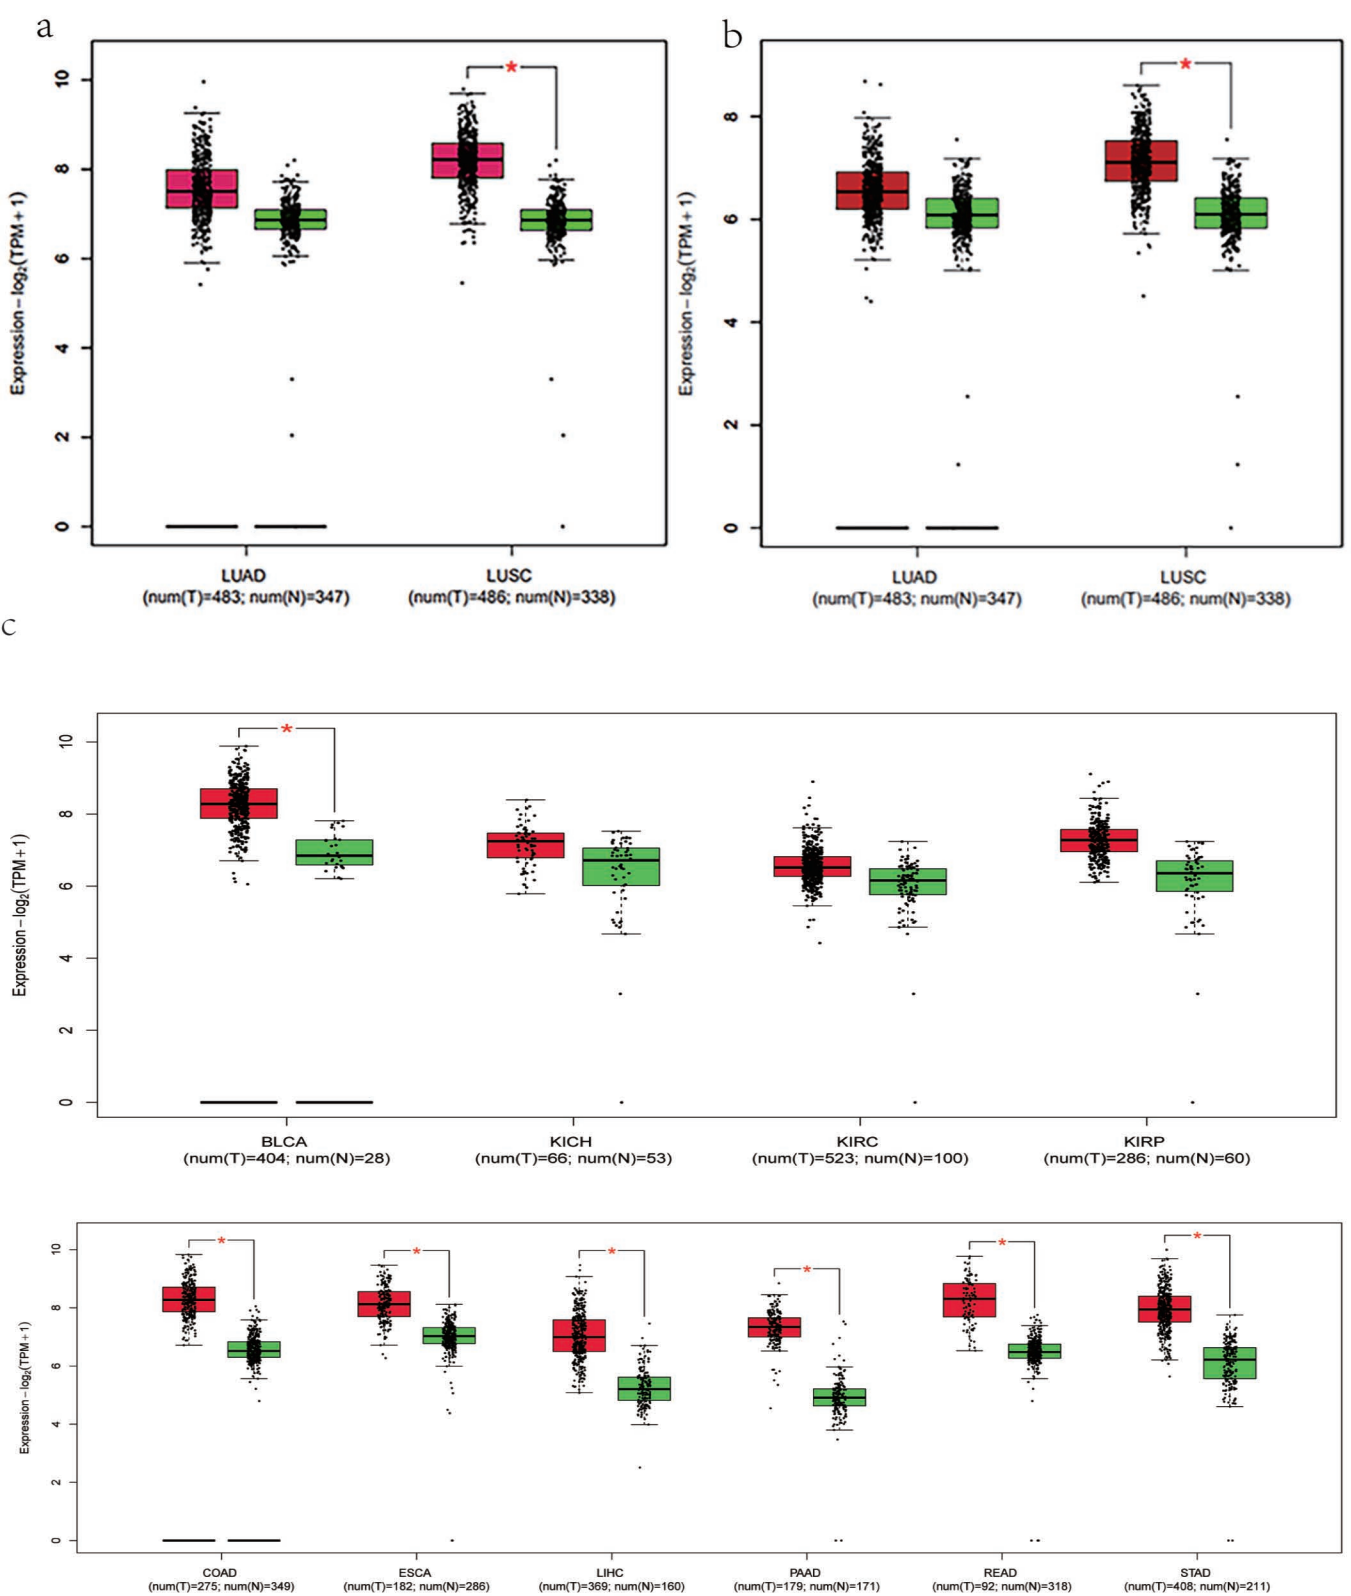

Supplementary Figure S4. a: The expression of SNRPB in respiratory tumors. b: The expression of LSM7 in respiratory tumors. c: The expression of SNRPB in urinary and digestive system tumors.
